# Supplementary material for: Fast luminescence from rare-earth-codoped BaSiF6nanowires with high aspect ratios
Source: Royal Society of Chemistry journal article supplement (doi:10.1039/c8tc01651h), 2018-01-01
Supplement: c8tc01651h1.pdf [file c8tc01651h1.pdf]

Electronic Supplementary Information (ESI)

## Fast luminescence from rare–earth–codoped BaSiF<sub>6</sub> nanowires with high aspect ratios

Gibin George,<sup>a</sup> Shanell L. Jackson,<sup>a</sup> Zariana R. Mobley,<sup>a</sup> Bhoj R. Gautam,<sup>a</sup> Dong Fang,<sup>\*b</sup> Jinfang Peng,<sup>†c</sup> Duan Luo,<sup>c</sup> Jianguo Wen,<sup>c</sup> Jason E. Davis,<sup>d</sup> Daryush Ila<sup>a</sup> and Zhiping Luo<sup>\*a</sup>

*a.* Department of Chemistry and Physics, Fayetteville State University, Fayetteville, NC 28301, USA. E-mail: zluo@uncfsu.edu.

*b.* College of Materials Science and Engineering, Kunming University of Science and Technology, Kunming 650093, P.R. China. E-mail: csufangdong@gmail.com.

*c.* Centre for Nanoscale Materials, Argonne National Laboratory, Argonne, Illinois 60439, USA.

*d.* Oak Ridge Institute for Science and Education, Oak Ridge Associated Universities, Oak Ridge, TN 37830, USA.

<sup>†</sup> Present address: Southwest Jiaotong University, Chengdu 610031, P.R. China.

### Results

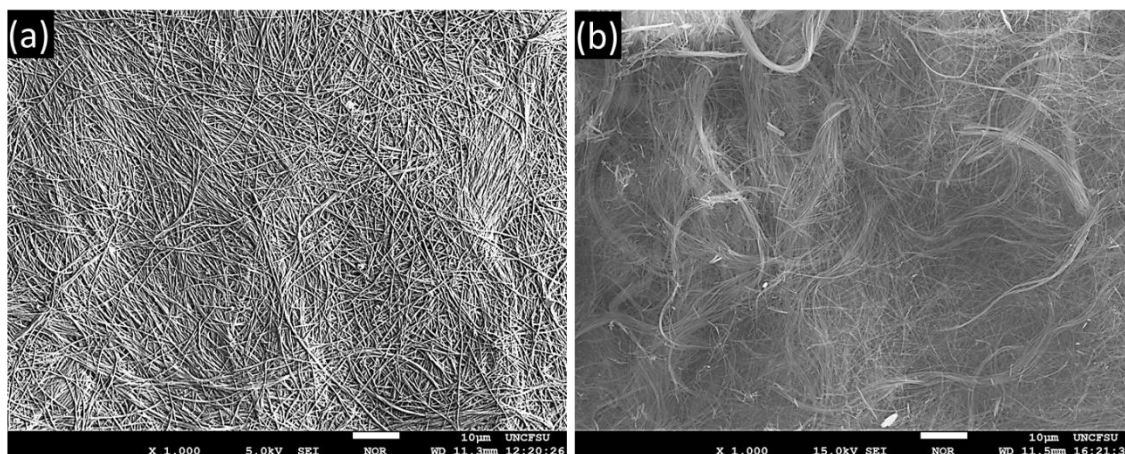

**Fig. S1** Low magnification SEM image of (a) BaSiF<sub>6</sub> nanowires and (b) BaF<sub>2</sub>, depicting the length of the nanowires.

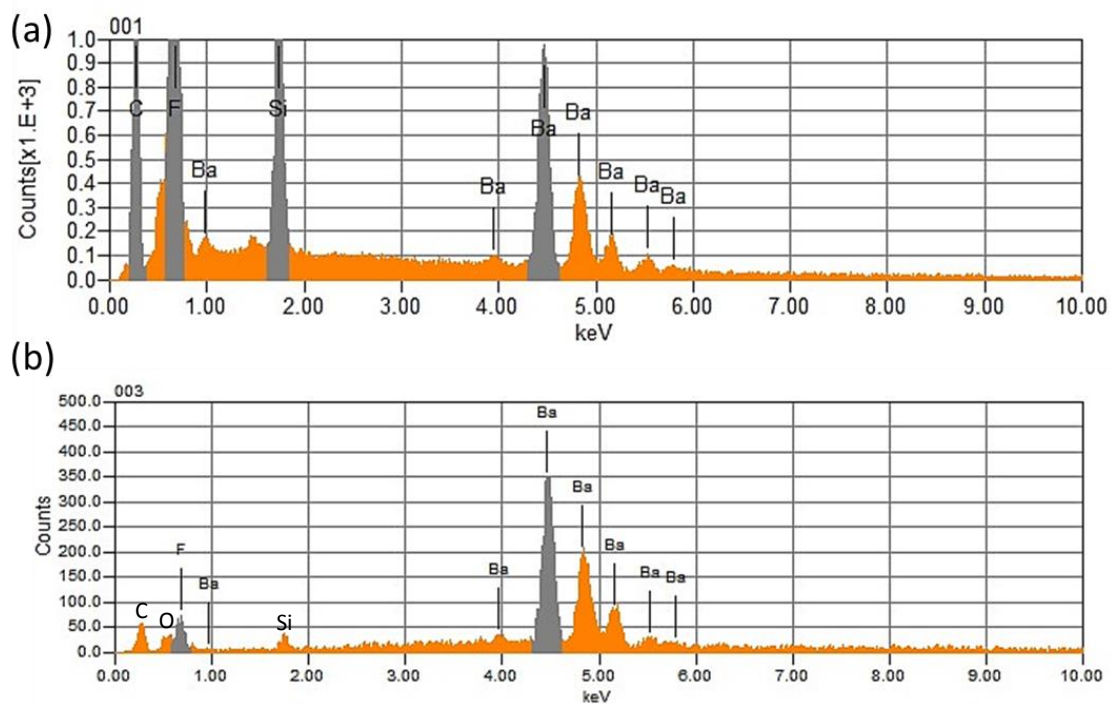

**Fig. S2** EDS results of (a)  $\text{BaSiF}_6$  and (b)  $\text{BaF}_2$  nanowires. C is from surface coating, and a low content of Si, possibly from  $\text{SiO}_2$ , is retained in  $\text{BaF}_2$  samples.

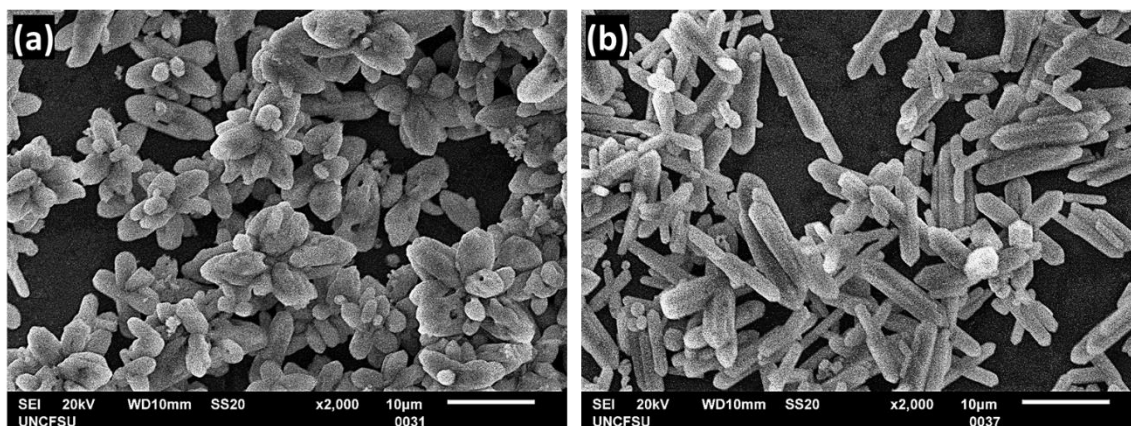

**Fig. S3** SEM images of (a)  $\text{BaSiF}_6$  and (b)  $\text{BaF}_2$  microparticles.

### Mechanism of formation of BaSiF<sub>6</sub> nanowires

The formation of the nanowires comprises two steps, nucleation in the first step and growth in the second stage. The growth of the nanowires takes place in the individual reaction chambers created by the microemulsion (Fig. S4). During the growth process, it is presumed that the wormlike reverse micelle formed around the water droplets by CTAB and 1-pentanol control the growth of the rods. The presence of silicon initiates the nucleation and subsequently, the growth of the nucleus continues to form nanowires in the micelles. The ability of silicon as the substrate for the preferential growth of nanomaterials is well known, and it is true in the case of BaSiF<sub>6</sub> nanorod formation also. As a matter of fact, an experiment conducted following the same reaction condition in the absence of silicon did not yield any nanowires. Ultimately, the growth of nanowires is a result of the synergic action of Si-ions and the microemulsions. In the case of doped nanowires, the trivalent dopant ions replace the divalent Ba ions. Equations S1 and S2 correspond to the overall chemical reaction involved in the formation of nanowires.

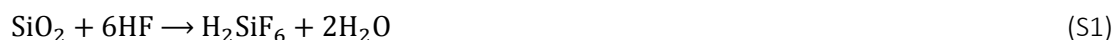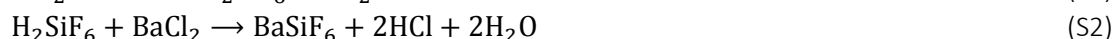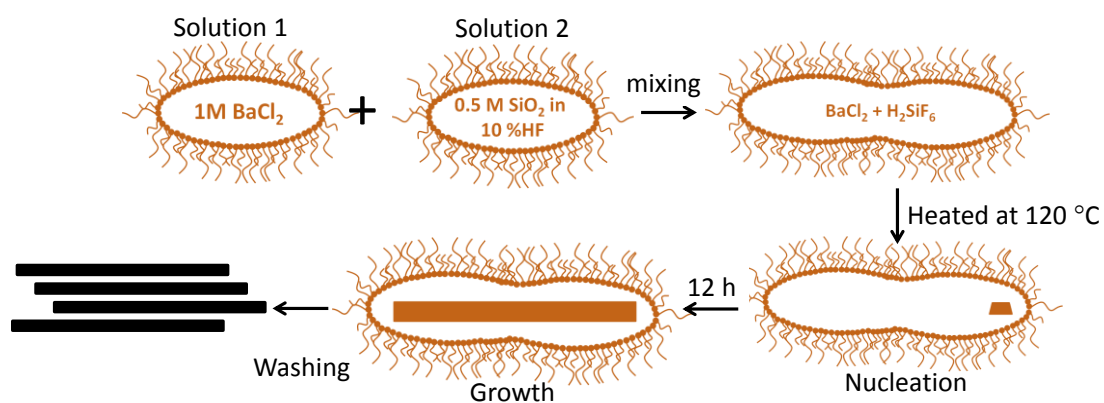

Fig. S4 Mechanism of formation of BaSiF<sub>6</sub> nanowires from microemulsion.

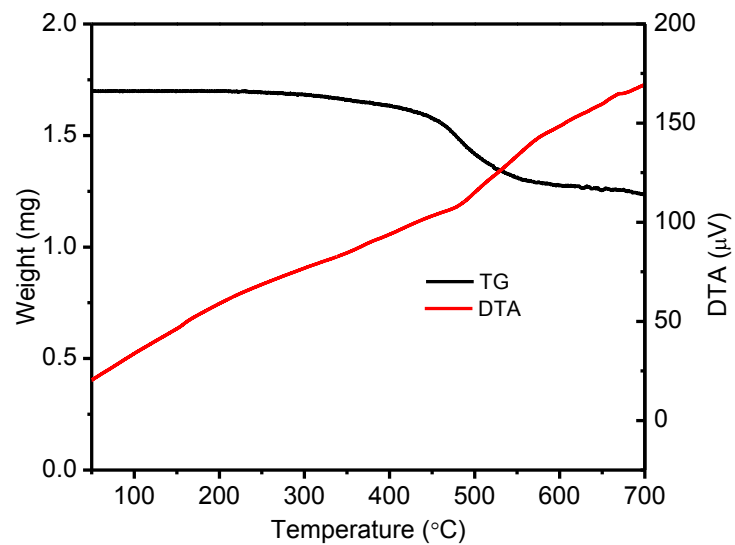

Fig. S5 TG Analysis of BaSiF<sub>6</sub> nanowires.

Table S1 ICP-OES results

| Sample              | Mol.% of Ba | Mol.% of Ce | Mol.% of Eu | Mol.% of Tb |
|---------------------|-------------|-------------|-------------|-------------|
| BSF                 | 100         | -           | -           | -           |
| BSF 1Ce-5Tb         | 96.39       | 0.57        |             | 3.04        |
| BSF 1Ce-30Tb        | 96.31       | 0.14        |             | 3.54        |
| BSF 1Ce-10Tb -1Eu   | 96.45       | 0.38        | 0.24        | 3.17        |
| BSF 1Ce-20Tb -1Eu   | 94.39       | 0.30        | 0.19        | 5.31        |
| BSF 2Ce-20Tb -0.5Eu | 95.43       | 0.44        | 0.07        | 4.13        |
| BF                  | 100         | -           | -           | -           |
| BF 1Ce-5Tb          | 96.69       | 0.33        | 0           | 2.98        |
| BF 1Ce-30Tb         | 96.82       | 0.12        | 0           | 3.06        |
| BF 1Ce-10Tb -1Eu    | 96.45       | 0.36        | 0.24        | 3.19        |
| BF 1Ce-20Tb -1Eu    | 94.92       | 0.28        | 0.17        | 4.81        |
| BF 2Ce-20Tb -0.5Eu  | 92.65       | 0.67        | 0.02        | 6.68        |

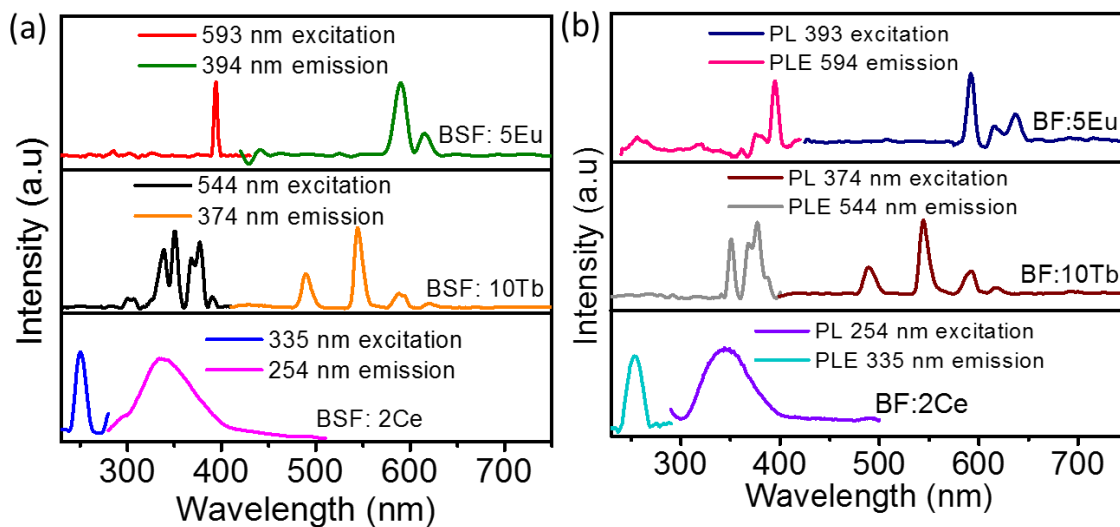

**Fig. S6** PL and PLE spectra of representative  $\text{Ce}^{3+}$ -doped,  $\text{Tb}^{3+}$ -doped, and  $\text{Eu}^{3+}$ -doped (a)  $\text{BaSiF}_6$  and (b)  $\text{BaF}_2$  nanowires.

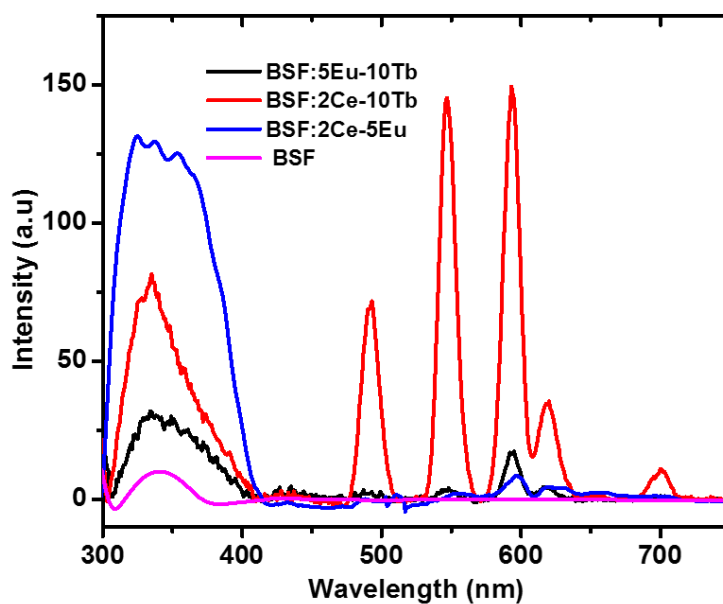

**Fig. S7** PL spectra of pure and binary doped  $\text{BaSiF}_6$  nanowires.

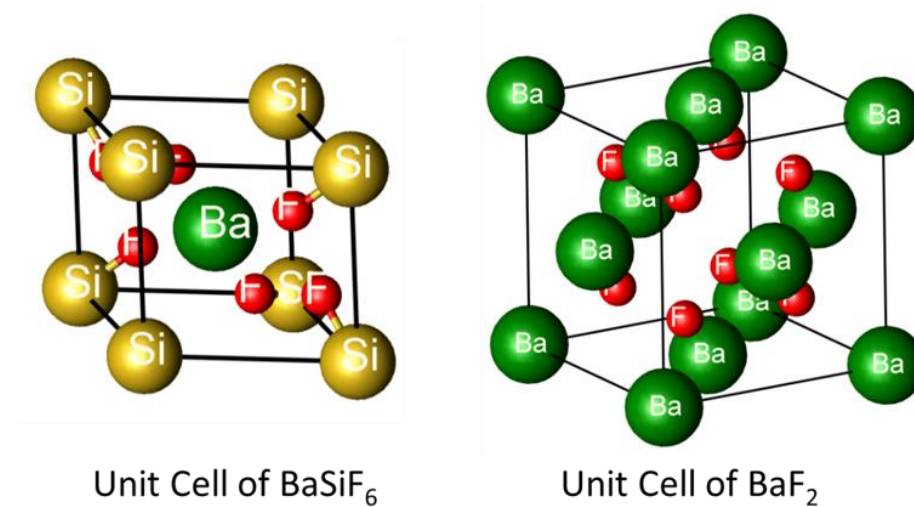

Fig. S8 Structure of BaSiF<sub>6</sub> and BaF<sub>2</sub>.

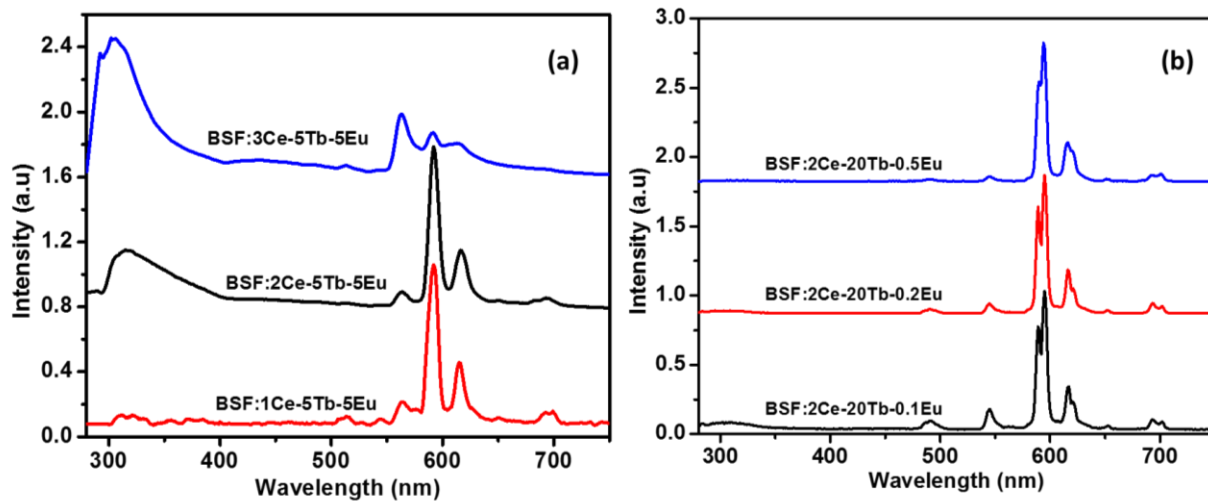

Fig. S9 Effect of (a) Ce<sup>3+</sup> and (b) Eu<sup>3+</sup> doping on the PL emission of BSF:xCe-yTb-zEu nanowires.

The energy transfer between Ce<sup>3+</sup>→Tb<sup>3+</sup>→Eu<sup>3+</sup> ions in the doped nanowires begins with the 5*d* excited state of Ce<sup>3+</sup> ions. The non-radiative energy release by these ions is absorbed by the <sup>5</sup>*D*<sub>3</sub> level of Tb<sup>3+</sup> ions as their excitation energy is close to that energy. The electrons in <sup>5</sup>*D*<sub>3</sub> are non-radiatively relaxed to the <sup>5</sup>*D*<sub>4</sub> level. This energy is then transferred to <sup>5</sup>*D*<sub>1</sub> levels of Eu<sup>3+</sup> and finally, the Eu<sup>3+</sup> ions release energy radiatively [1]. The low lattice phonon energy of fluorides might result in the efficient energy transfer from Tb<sup>3+</sup> to Eu<sup>3+</sup> ions, as a result, the nanowires do not exhibit a strong green emission corresponding to the Tb<sup>3+</sup> ions.

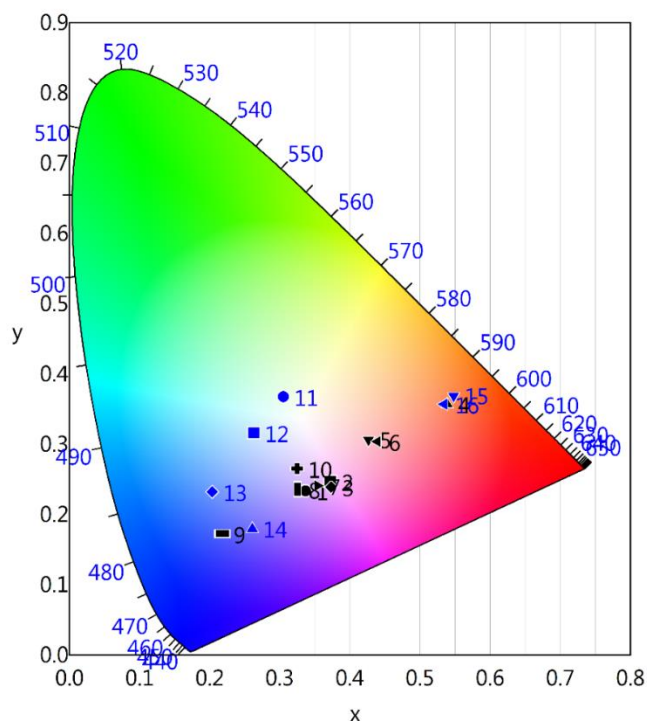

**Fig. S10** CIE coordinates of BSF codoped nanowires.

The CIE coordinates of BSF:xCe–yTb and BSF:xCe–yTb–zEu codoped nanowires excited by 376 nm sources were calculated using Colorcalculator 7.21 [2] from the respective PL emission spectra and the chromaticity coordinates and CIE chromaticity diagram are shown in Table S1 and Fig. S10, respectively.

**Table S2** Calculated CIE Coordinates of BSF:xCe–yTb–zEu codoped nanowires excited by 376 nm source.

| Sample No | Sample composition | CIE (X) | CIE (Y) |
|-----------|--------------------|---------|---------|
| 1         | 1Ce–5Tb            | 0.2182  | 0.1725  |
| 2         | 1Ce–10Tb           | 0.3248  | 0.2651  |
| 3         | 1Ce–15Tb           | 0.3051  | 0.3677  |
| 4         | 1Ce–20Tb           | 0.2631  | 0.3162  |
| 5         | 1Ce–30Tb           | 0.2036  | 0.2322  |
| 6         | 1Ce–5Tb–1Eu        | 0.3434  | 0.2191  |
| 7         | 1Ce–10Tb–1Eu       | 0.3803  | 0.2391  |
| 8         | 1Ce–15Tb –0.5Eu    | 0.5342  | 0.357   |
| 9         | 1Ce–20Tb –0.5Eu    | 0.5478  | 0.3702  |
| 10        | 1Ce–20Tb –1Eu      | 0.3758  | 0.2366  |
| 11        | 1Ce–30Tb –1Eu      | 0.5459  | 0.359   |
| 12        | 2Ce–10Tb –3Eu      | 0.3595  | 0.2332  |
| 13        | 2Ce–10Tb –5Eu      | 0.3329  | 0.2186  |
| 14        | 2Ce–20Tb –0.1Eu    | 0.2607  | 0.1804  |
| 15        | 2Ce–20Tb –0.2Eu    | 0.4666  | 0.3245  |
| 16        | 2Ce–20Tb –0.5Eu    | 0.4508  | 0.3033  |

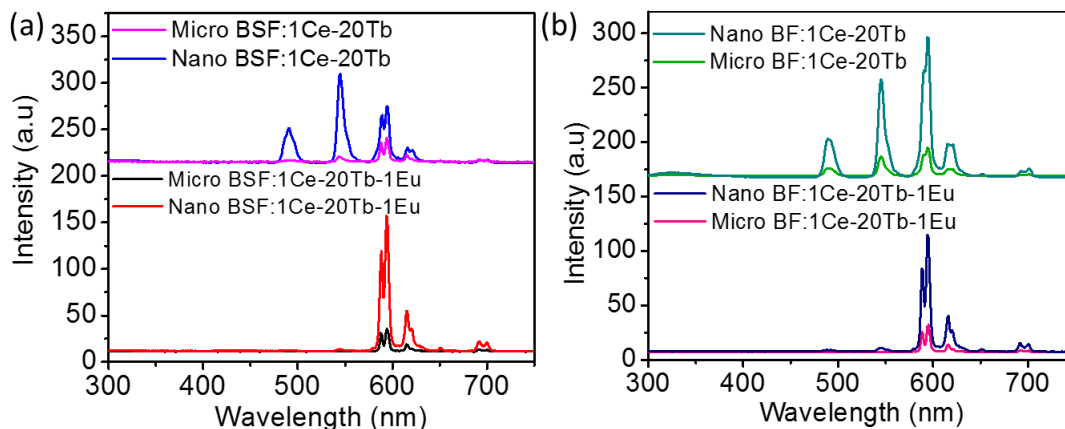

**Fig. S11** Comparison of PL emission from codoped microparticle material and nanowires (a) BaSiF<sub>6</sub> and (b) BaF<sub>2</sub>.

The lifetime curves of all the samples can be fitted to double exponential function consisting of fast and slow lifetime components (Equation S3) and the constants in the fitting parameters is presented in Table 1.

$$I(t) = \alpha_1 \cdot e^{(-t/\tau_1)} + \alpha_2 \cdot e^{(-t/\tau_2)} \quad (\text{S3})$$

Where (t) is the light intensity at any time,  $t$ , after switching off the excitation illumination,  $\alpha_i$  is a time-invariant constant and  $\tau_i$  is a decay constant (or lifetime) for the exponential components. The average lifetime is calculated as per Equations S4 and S5 [3];

$$\tau_{\text{average}} = \sum_{i=1}^n f_i \cdot \tau_i \quad (\text{S4})$$

Where  $f_i$  is the fractional contribution,

$$f_i = \alpha_i \tau_i / (\sum_{i=1}^n \alpha_i \tau_i) \quad (\text{S5})$$

## References

- 1 X. Zhang, M. Gong, *Ind. Eng. Chem. Res.*, 2015, **54**, 7632–7639.
- 2 LED ColorCalculator | OSRAM SYLVANIA <https://www.osram.us/cb/tools-and-resources/applications/led-colorcalculator/index.jsp> (accessed Jan 26, 2018).
- 3 J. R. Lakowicz, *Principles of Fluorescence Spectroscopy*, Springer US, 2006.
